# Supplementary material for: Katanin, kinesin-13 and ataxin-2 inhibit premature interaction between maternal and paternal genomes in C. elegans zygotes
Source: bioRxiv preprint, doi:10.1101/2024.03.12.584242, version 2 (2024-06-26)
Supplement: Supplementary data file [file 584242_file11.xlsx]

## Sheet: ctrl rnai N2 1_4
		individual intensity		distance
		201.274		40.213
slide 1_4 slice 9 (SPERM PLANE)	Background Intensity	1	1	1	1	g	g	g	g	g	g	g	g
Mean Value	1166.76	1337.75	1291.23	1473.15	1312.42	1339.58	1903.92	1885.94	1893.37	2077.46	1975.13	1562.15	1420.52
Corrected Value		170.99	124.471	306.394	145.663	172.817	737.163	719.182	726.605	910.702	808.375	395.394	253.764
Distance (microns)		6.293	4.994	4.327	4.576	3.905	3.028	3.154	3.063	2.186	2.157	1.987	2.072
Corrected Distance		6.293	4.994	4.327	4.576	3.905	3.028	3.154	3.063	2.186	2.157	1.987	2.072
Percent Distance						9.71079	7.5299	7.84323	7.61694	5.43605	5.36394	4.94119	5.15256
# of mitochondria						0.858615	3.66248	3.57315	3.61003	4.52468	4.01629	1.96445	1.26079
slide 1_4 slice 10		1	1	g	g	g	g	g	g	g
Mean Value		1412	1546.94	2730.67	1628.31	2301.15	2181.27	2410.02	1617.25	1309.9
Corrected Value		245.24	380.182	1563.91	461.548	1134.39	1014.51	1243.26	450.49	143.144
Distance (microns)		3.71	3.101	2.969	2.865	2.113	2.029	2.03	0.978	2.337
Corrected Distance		3.84241	3.25825	3.13288	3.03451	2.33768	2.26204	2.26294	1.39874	2.54196
Percent Distance				7.79072	7.54608	5.81326	5.62515	5.62739	3.47834	6.32124
# of mitochondria				7.77006	2.29313	5.63606	5.04043	6.17694	2.23819	0.711189
slide 1_4 slice 11		g	g	g	g	g	g
Mean Value		2186.15	1979.44	2421.19	1807.13	1741.92	1911.87
Corrected Value		1019.39	812.682	1254.43	640.375	575.163	745.105
Distance (microns)		3.08	1.939	2.466	3.157	1.732	2.356
Corrected Distance		3.67238	2.78563	3.17508	3.7372	2.64572	3.09043
Percent Distance		9.13233	6.92718	7.89566	9.29351	6.57926	7.68514
# of mitochondria		5.0647	4.03769	6.23245	3.1816	2.85761	3.70194
slide 1_4 slice 12		g	g	g
Mean Value		1920.9	1948.77	1670.52
Corrected Value		754.144	782.009	503.759
Distance (microns)		2.172	2.299	3.298
Corrected Distance		3.70373	3.7796	4.45834
Percent Distance		9.21027	9.39896	11.0868
# of mitochondria		3.74685	3.88529	2.50285
slide 1_4 slice 13		g	g	g	g
Mean Value		1235.9	1553.83	1620.96	1416.29
Corrected Value		69.144	387.067	454.202	249.528
Distance (microns)		5.687	3.029	2.199	3.047
Corrected Distance		6.95284	5.01745	4.5646	5.02834
Percent Distance		17.29	12.4772	11.3511	12.5043
# of mitochondria		0.343531	1.92308	2.25663	1.23974
slide 1_4 slice 14		g
Mean Value		1394.04
Corrected Value		227.278
Distance (microns)		2.32
Corrected Distance		5.51202
Percent Distance		13.7071
# of mitochondria		1.1292
slide 1_4 slice 8		1	1	1	1	g	g	g	g	g	g	g	g	g	g	g	g	g	g	g
Mean Value		1278.12	1303.15	1359.37	1261.02	1286.54	1593.17	1968.79	1757.15	1573.25	1738.21	1618.96	1686.31	1301.15	1778.56	1960.06	1624.83	1560.81	1686.19	1169.6
Corrected Value		111.355	136.394	192.605	94.259	119.778	426.413	802.028	590.394	406.49	571.452	452.202	519.548	134.394	611.798	793.298	458.067	394.048	519.432	2.836
Distance (microns)		5.187	4.802	4.256	4.603	6.156	4.051	3.537	2.795	2.45	1.96	1.113	1.328	2.267	1.814	1.999	1.874	1.143	0.666	2.099
Corrected Distance		5.28252	4.90502	4.3719	4.71037	6.23669	4.1726	3.67565	2.96851	2.64622	2.20036	1.49625	1.6624	2.47776	2.07138	2.23517	2.12412	1.5187	1.20148	2.32504
Percent Distance						15.5091	10.3762	9.14044	7.38195	6.58052	5.47177	3.72082	4.13399	6.16159	5.15101	5.55834	5.28217	3.77664	2.98779	5.78181
# of mitochondria						0.595099	2.11857	3.98475	2.93328	2.01958	2.83917	2.2467	2.58129	0.667716	3.03962	3.94138	2.27584	1.95777	2.58072	0.0140902
slide 1_4 slice 7		1	1	g	g	g	g	g	g	g	g	g	g	g	g
Mean Value		1309.38	1518.85	1299.04	1328.46	1585.83	1549.04	1406.79	2747.35	1728.25	2132.1	1849	2382.06	2499.08	1408.04
Corrected Value		142.625	352.086	132.278	161.702	419.067	382.278	240.028	1580.59	561.49	965.336	682.24	1215.3	1332.32	241.278
Distance (microns)		4.791	2.072	4.06	4.035	3.562	3.107	2.788	1.259	0.571	0.424	0.834	1.643	1.941	1.652
Corrected Distance		5.19169	2.87979	4.52588	4.50347	4.08508	3.69506	3.43117	2.36328	2.07991	2.04445	2.16692	2.58833	2.78702	2.59405
Percent Distance				11.2548	11.199	10.1586	9.18871	8.5325	5.8769	5.17224	5.08405	5.38861	6.43655	6.93064	6.45078
# of mitochondria				0.657203	0.803392	2.08207	1.89929	1.19254	7.8529	2.78968	4.79612	3.3896	6.03802	6.61941	1.19875
slide 1_4 slice 6		1	g	g	g	g	g	g	g
Mean Value		1634.71	1238.21	2105.56	1904.33	2295.42	1882.85	1936.21	1519.9
Corrected Value		467.952	71.452	938.798	737.567	1128.66	716.086	769.452	353.144
Distance (microns)		1.157	8.443	1.615	0.781	1.683	2.148	0.364	0.804
Corrected Distance		3.21538	8.96015	3.40708	3.09999	3.43984	3.6897	3.022	3.10587
Percent Distance			22.2817	8.47259	7.70893	8.55405	9.1754	7.51499	7.72354
# of mitochondria			0.354998	4.66427	3.66449	5.60759	3.55776	3.8229	1.75454
slide 1_4 slice 5		1	g	g	g	g	g	g	g
Mean Value		1316.73	1218.19	1240.96	1240.96	1583.19	1452.71	1588.92	1419.92
Corrected Value		149.971	51.432	74.202	74.202	416.432	285.952	422.163	253.163
Distance (microns)		3.276	6.826	8.475	3.701	1.227	1.277	1.935	0.498
Corrected Distance		5.17032	7.91165	9.37153	5.44953	4.18396	4.1989	4.44345	4.03088
Percent Distance			19.6744	23.3047	13.5517	10.4045	10.4416	11.0498	10.0238
# of mitochondria			0.255532	0.368661	0.368661	2.06898	1.42071	2.09745	1.2578
slide 1_4 slice 4		1	1	g
Mean Value		1413.02	1452.81	1278.52
Corrected Value		246.259	286.048	111.759
Distance (microns)		1.86	3.977	3.249
Corrected Distance		5.33475	6.38878	5.96289
Percent Distance				14.8283
# of mitochondria				0.555257
slide 1_4 slice 3		g	g
Mean Value		1280.12	1257.79
Corrected Value		113.355	91.028
Distance (microns)		1.956	3.899
Corrected Distance		6.31078	7.15557
Percent Distance		15.6934	17.7942
# of mitochondria		0.563187	0.452259
slide 1_4 slice 2		1	1
Mean Value		1225.73	1178.23
Corrected Value		58.971	11.471
Distance (microns)		3.358	1.969
Corrected Distance		7.76377	7.27165
Percent Distance
# of mitochondria

## Sheet: ctrl rnai N2 1_7
control
embryo length	47.507		average mito	1003.99				ROI	8 pixels
1_7 slice 2 (SPERM PLANE)	Background Intensity	1	1	1	1	1	1	1
Mean Value	952.637	997.365	1092.75	1653.81	2256.35	2206.6	1579.5	2213.58	2358.5	2974.31	3347.81	4492.33	4050.71	2118.67	1937.63	1523.58
Corrected Value		44.728	140.113	701.171	1303.71	1253.96	626.863	1260.94	1405.86	2021.67	2395.17	3539.69	3098.07	1166.04	984.998	570.944
Distance (microns)		5.594	5.158	1.484	1.419	0.814	1.394	1.891	2.614	2.192	2.871	2.551	2.123	2.299	2.175	1.834
# of mitochondria									1.40028	2.01364	2.38565	3.52562	3.08576	1.1614	0.981084	0.568675
1_7 slice 3		1	1	1	1	1	1	1	1	1
Mean Value		1504.04	2455.92	2434.1	1387.15	1885.88	2866.92	2337.14	2005.98	2700.73	2408.54	3207.9	2626.89
Corrected Value		551.401	1503.29	1481.46	434.517	933.248	1914.29	1384.5	1053.34	1748.09	1455.9	2255.27	1674.25
Distance (microns)		3.166	0.726	2.369	5.125	1.458	2.426	2.172	2.913	1.478	1.787	2.518	2.201
Corrected Distance		3.32017	1.23575	2.57141	5.22165	1.76798	2.62402	2.39115	3.07987	1.78451	2.04777	2.7093	2.41752
# of mitochondria											1.45011	2.24631	1.66759
1_7 slice 4		1	1	1	1
Mean Value		1411.25	2125.96	2624.6	2449.56	3431.31	5863.98	4139.39	1190.58	2248.69
Corrected Value		458.613	1173.33	1671.96	1496.92	2478.67	4911.34	3186.75	237.94	1296.06
Distance (microns)		3.133	1.501	0.845	1.272	2.081	1.857	1.267	5.061	2.406
Corrected Distance		3.71695	2.5006	2.17118	2.37023	2.88627	2.72918	2.36755	5.44185	3.12871
# of mitochondria						2.46882	4.89183	3.17408	0.236994	1.2909
1_7 slice 5
Mean Value		6599.79	2672.39
Corrected Value		5647.15	1719.75
Distance (microns)		1.814	0.778
Corrected Distance		3.50579	3.09924
# of mitochondria		5.62471	1.71291
1_7 slice 6
Mean Value		3274.1	2839.29
Corrected Value		2321.46	1886.65
Distance (microns)		1.73	2.295
Corrected Distance		4.35808	4.61162
# of mitochondria		2.31223	1.87915
1_7 slice 8
Mean Value		1372.46
Corrected Value		419.825
Distance (microns)		3.04
Corrected Distance		6.72619
# of mitochondria		0.418157
1_7 slice 1		1	1	1	1
Mean Value		1438.52	2231.92	1733.27	1366.15	3869.39	3608.54	5286.4	6652.02	2205.31	1534.73	1649.19
Corrected Value		485.882	1279.29	780.632	413.517	2916.75	2655.9	4333.77	5699.38	1252.67	582.094	696.555
Distance (microns)		1.611	0.828	1.627	3.978	2.235	2.786	2.442	2.245	2.956	0.724	1.236
Corrected Distance		1.89613	1.2983	1.90975	4.10177	2.44851	2.96003	2.63882	2.45765	3.12057	1.23458	1.58987
# of mitochondria		0.483951	1.2742	0.77753	0.411874	2.90516	2.64535	4.31655	5.67673	1.24769	0.579781	0.693787

## Sheet: ctrl rnai N2 1_10
control 1_10
slice 1	background intensity	1 mito	grps
mean	328.813	746.327	874.519	872.365	815.942	744.308	770.327	1047.58	1249.44	1205.5	1230.87	1341.63	943.865	887.365	971.288
corrected		417.514	545.706	543.552	487.129	415.495	441.514	718.764	920.629	876.687	902.052	1012.82	615.052	558.552	642.475
distance		1.541	2.139	1.011	1.881	2.247	1.526	0.747	0.541	1.211	1.002	1.199	1.845	1.819	2.606
corrected distance		1.83703	2.36121	1.42201	2.1303	2.45947	1.82447	1.2482	1.13696	1.57052	1.41563	1.56128	2.09858	2.07576	2.79128
no. of mito			1.39044	1.38496	1.24119	1.05867	1.12497	1.83139	2.34574	2.23377	2.2984	2.58064	1.56714	1.42317	1.63701
slice 2- sperm plane	background	grps
mean	328.813	994.846	1170.46	1112.23	1146.1	1399.12	1833.69	1863.94	1269.52	1917.06	1437.33	946.385	1136.4	1012.73	1214	1067.17	729.654
corrected		666.033	841.649	783.418	817.283	1070.3	1504.88	1535.13	940.706	1588.24	1108.51	617.572	807.591	683.918	885.187	738.36	400.841
distance		2.751	2.145	2.069	1.85	1.072	1.133	0.651	1.811	1.134	0.818	1.715	0.852	1.883	1.253	1.763	6.346
no. of mito		1.69703	2.1445	1.99613	2.08241	2.7271	3.83439	3.91147	2.39689	4.0468	2.82446	1.57356	2.05772	1.7426	2.25543	1.88132	1.02133
slice 3	background	grps
mean	328.813	1447.08	1710.79	1651.33	1853.37	2662.21	1921.9	1990.44	2331.11	1226.79	1877.71	1645.63	988.5
corrected		1118.26	1381.97	1322.51	1524.55	2333.4	1593.09	1661.63	2002.3	897.975	1548.9	1316.82	659.687
distance		1.808	1.496	1.552	2.136	1.372	1.1	0.592	0.65	1.488	0.678	1.455	2.007
corrected distance		2.06612	1.79945	1.84627	2.35849	1.69776	1.48661	1.16209	1.19269	1.7928	1.20817	1.76551	2.24233
no. of mito		2.84931	3.52123	3.36973	3.88452	5.94544	4.05915	4.23378	5.10181	2.28802	3.94655	3.35523	1.68086
slice 4	background	grps
mean	328.813	1076.63	1518.65	1211.25	5427.25	7336.96	3868.58	1504.23	1366.25	1168.15	1022.88	1345.23	842.077	903.635	951.096
corrected		747.822	1189.84	882.437	5098.44	7008.15	3539.76	1175.42	1037.44	839.341	694.072	1016.42	513.264	574.822	622.283
distance		1.944	1.7	0.885	1.475	1.9	1.077	0.825	0.685	1.428	1.556	0.73	1.864	1.365	5.907
corrected distance		2.78911	2.62488	2.18706	2.48508	2.75862	2.27155	2.16348	2.11405	2.45748	2.534	2.12906	2.73395	2.42141	6.2364
no. of mito		1.90543	3.03168	2.24842	12.9907	17.8566	9.01922	2.99493	2.64336	2.13862	1.76848	2.5898	1.30778	1.46463	1.58556
slice 5	background	grps
mean	328.813	952.5	807.519	1164.33	1051.37	962.096	922.144	3802.48	4643.98	4059.69
corrected		623.687	478.706	835.514	722.552	633.283	593.331	3473.67	4315.17	3730.88
distance		6.08	1.864	0.631	1.149	1.636	1.355	1.728	1.672	2.394
corrected distance		6.77985	3.53193	3.06564	3.21251	3.41709	3.29181	3.46208	3.43447	3.83813
no. of mito		1.58914	1.21973	2.12887	1.84104	1.61359	1.51179	8.85081	10.9949	9.50618
slice 6	background	1 mito		grps
mean	328.813	656	761.519	844.5	775.154	959.846	970.173	1176.73	1589.73	1515.58	1586.69
corrected		327.187	432.706	515.687	446.341	631.033	641.36	847.918	1260.92	1186.76	1257.88
distance		7.217	6.28	1.723	1.194	1.742	2.144	2.302	2.524	2.047	1.26
corrected distance		8.25137	7.4457	4.35531	4.1744	4.36286	4.53836	4.61511	4.72975	4.49335	4.19376
no. of mito				1.31396	1.13726	1.60785	1.63417	2.16047	3.21278	3.02384	3.20504
slice 7	background	grps
mean	328.813	880.212	1052.83	982.788
corrected		551.399	724.014	653.975
distance		1.807	1.484	2.059
corrected distance		5.31651	5.21558	5.40735
no. of mito		1.40495	1.84477	1.66631
avg 1 mito	392.469
embryo length	38.45

## Sheet: ctrl rnai N2 1_15
1_15
slice 8	background intensity	1 mito	grps
mean	498.855	3203.25	2526.42
corrected		2704.39	2027.57
distance		5.851	3.442
corrected distance		8.38058	6.91718
no. of mito
slice 9		1 mito		grps
mean	498.855	3377.98	2804.58	5614.96	5098.36	5622.96
corrected		2879.13	2305.72	5116.11	4599.51	5124.11
distance		5.886	5.778	3.528	2.719	2.476
corrected distance		7.72302	7.64103	6.11938	5.69148	5.57948
no. of mito
slice 10		1mito	grps
mean	498.855	4501.21	12735.1	18265.4	11814.2	12279.9
corrected		4002.36	12236.2	17766.6	11315.3	11781
distance		10.204	2.363	1.821	3.86	3.236
corrected distance		10.6359	3.81887	3.50942	4.88872	4.41267
no. of mito
slice 11		1 mito	grps
mean	498.855	5634.25	7940.96	5299	4641.65	4763.42	8286.23	10658.9	16916.5	26943.6	17185	4208.71
corrected		5135.4	7442.11	4800.15	4142.8	4264.57	7787.38	10160.1	16417.7	26444.7	16686.2	3709.86
distance		8.868	4.049	3.714	4.215	3.73	3.931	3.243	2.506	2.144	1.633	2.154
corrected distance		9.09073	4.51602	4.21827	4.66543	4.23236	4.41053	3.81012	3.20625	2.93202	2.58199	2.93934
no. of mito
slice 12		1 mito	grps
mean	498.855	6600.25	6820.4	4481.81	6337.67	11470.1	10118	10389.3	8121.85	5706.64	9449.42	17204.6	17578.9	10077.9	6898.52	5146.17	7634.11
corrected		6101.4	6321.55	3982.95	5838.82	10971.3	9619.18	9890.41	7622.99	5207.78	8950.57	16705.8	17080.1	9579.09	6399.66	4647.32	7135.26
distance		1.086	8.24	4.991	4.432	4.145	3.778	3.756	4.248	3.148	2.91	2.708	2.131	2.296	2.804	2.182	2.297
corrected distance		1.47628	8.30046	5.09019	4.54342	4.26392	3.9081	3.88684	4.36412	3.30301	3.07703	2.88674	2.35397	2.50432	2.97698	2.40023	2.50524
no of mito			1.44989	0.913517	1.33917	2.51634	2.20623	2.26843	1.74838	1.19444	2.05287	3.83158	3.91743	2.19703	1.46781	1.06589	1.63652
slice 13- sperm plane		1 mito	grps
mean	498.855	5413.86	7632.04	9057.69	11017.1	16620.1	15781.8	7641.21	10997.4	6318.4	7856.96	4603.08	5700.96	7880.4	10517.7	11627.4	7335.67	8241.15	5393.52
corrected		4915.01	7133.18	8558.84	10518.3	16121.2	15282.9	7142.36	10498.6	5819.55	7358.11	4104.22	5202.11	7381.55	10018.8	11128.6	6836.82	7742.3	4894.66
distance		8.253	4.974	4.29	4.318	3.791	3.791	4.101	3.585	3.987	2.951	2.094	2.147	2.664	2.741	2.131	2.002	2.293	1.057
no. of mito			1.63604	1.96303	2.41244	3.69751	3.50524	1.63815	2.40792	1.33475	1.68763	0.941331	1.19314	1.69301	2.29789	2.55241	1.56807	1.77575	1.12262
slice 14		1 mito		grps
mean	498.855	6145.89	6048.6	10180.2	7471.02	12411.7	14336.6	12159.7	9065.52	7837.08	7095.27
corrected		5647.03	5549.74	9681.36	6972.16	11912.9	13837.7	11660.9	8566.66	7338.22	6596.41
distance		10.484	2.022	4.585	4.433	3.717	3.827	2.966	3.112	2.4	2.199
corrected distance		10.5316	2.25577	4.69278	4.54439	3.84917	3.95549	3.13004	3.26872	2.6	2.4157
no. of mito				2.22049	1.59911	2.73229	3.17378	2.6745	1.96482	1.68307	1.51293
slice 15		grps
mean	498.855	6566.29	4886.29	4637.9	7503.79	8965.23	9132.56	14018.3	12679.9	6306.61
corrected		6067.43	4387.43	4139.05	7004.93	8466.38	8633.7	13519.5	12181.1	5807.76
distance		4.76	4.475	4.479	4.251	4.214	3.553	3.039	2.285	2.158
corrected distance		5.1631	4.90159	4.90525	4.69798	4.66453	4.07723	3.63807	3.03665	2.94227
no. of mito		1.39161	1.00629	0.949319	1.60663	1.94182	1.9802	3.10079	2.79381	1.33205
slice 16		grps
mean	498.855	5662.81	5061.54	5578.92	11033.2	7662.89	10192.8	6501.19
corrected		5163.95	4562.68	5080.07	10534.4	7164.03	9693.95	6002.34
distance		3.413	3.472	2.559	2.514	2.455	1.933	1.805
corrected distance		4.54407	4.58855	3.94316	3.9141	3.87647	3.56882	3.50115
no. of mito		1.18439	1.04648	1.16515	2.41614	1.64312	2.22337	1.37668
slice 17		grps
mean	498.855	5996.19	5611.23	5558.27	5840.89	6293.94
corrected		5497.34	5112.38	5059.41	5342.03	5795.09
distance		1.697	1.634	2.02	2.362	1.608
corrected distance		4.34509	4.32087	4.48112	4.64532	4.31111
no. of mito		1.26085	1.17256	1.16041	1.22523	1.32914
avg 1 mito	4360.02
embryo length	40.024

## Sheet: ctrl rnai N2 1_16
embryo length	40.108		average mito	683.447
1_16 slice 5 (SPERM PLANE)	Background Intensity	1	1	1	1	1	1	1
Mean Value	389.377	751.558	1056.9	932.519	1107.29	1170.02	1076.87	938.077	510.654	1506.69	1508.75	2212	2312.25	2219.75	1646.23	1697.79	1427.77
Corrected Value		362.181	667.527	543.142	717.911	780.642	687.488	548.7	121.277	1117.32	1119.37	1822.62	1922.87	1830.37	1256.85	1308.41	1038.39
Distance (microns)		6.687	2.499	2.561	1.823	1.807	1.191	1.048	10.682	1.459	1.49	2.659	3.186	3.33	2.522	3.913	4.015
Corrected Distance
# of mitochondria									0.177449	1.63482	1.63783	2.66681	2.81349	2.67815	1.83899	1.91443	1.51934
1_16 slice 6		1	1	1
Mean Value		686.538	1257.56	1147.96	1367.37	1279.37	1488.56	1365.54	4050.69	1595.69	1458.44
Corrected Value		297.161	868.181	758.585	977.988	889.988	1099.18	976.161	3661.32	1206.32	1069.07
Distance (microns)		6.589	2.537	1.994	1.94	1.322	1.729	2.09	2.775	2.864	4.002
Corrected Distance		6.66445	2.72697	2.2307	2.18257	1.65761	1.99736	2.31692	2.94968	3.03356	4.12505
# of mitochondria					1.43096	1.3022	1.60829	1.42829	5.35713	1.76504	1.56422
1_16 slice 7		1	1	1	1	1
Mean Value		682.038	1171.02	861.269	1652.13	580.683	2053.23	1435.46	9707.52	1011.17	938	1277.15	1145.85
Corrected Value		292.661	781.642	471.892	1262.76	191.306	1663.85	1046.09	9318.14	621.796	548.623	887.777	756.469
Distance (microns)		3.693	1.914	2.283	2.14	5.847	2.979	1.954	3.122	6.209	7.031	0.932	1.179
Corrected Distance		4.19979	2.76828	3.03514	2.9291	6.1796	3.5881	2.79609	3.70768	6.52316	7.30992	2.2065	2.32165
# of mitochondria							2.4345	1.5306	13.634	0.909794	0.802729	1.29897	1.10684
1_16 slice 8		1	1	1	1	1	1	1	1
Mean Value		1385.06	1650.31	1190.98	1021.23	1318.54	1207.5	848.038	1276.88	2164.94	1667.67	1562.08	844.058	771.827	1852.87	5491.21	4007.89
Corrected Value		995.681	1260.93	801.604	631.854	929.161	818.123	458.661	887.508	1775.57	1278.3	1172.7	454.681	382.45	1463.49	5101.84	3618.51
Distance (microns)		0.742	2.368	5.743	5.744	6.249	6.358	7.042	6.861	1.2	1.392	0.722	1.957	2.227	1.841	2.636	3.263
Corrected Distance		3.0904	3.82197	6.47936	6.48024	6.93181	7.03023	7.6544	7.48821	3.2311	3.30721	3.08566	3.58188	3.73625	3.51984	3.99356	4.43251
# of mitochondria										2.59795	1.87037	1.71586	0.665276	0.55959	2.14133	7.46486	5.2945
1_16 slice 9
Mean Value		1636.94	1034.17
Corrected Value		1247.57	644.796
Distance (microns)		1.055	6.823
Corrected Distance		4.13679	7.90907
# of mitochondria		1.8254	0.943447
1_16 slice 4		1	1
Mean Value		649.885	1199.75	1256.75	1233.81	1205.31	802.923	866.75	719.038
Corrected Value		260.508	810.373	867.373	844.431	815.931	413.546	477.373	329.661
Distance (microns)		4.464	1.432	2.633	3.481	3.328	1.12	3.285	0.849
Corrected Distance		4.57464	1.7466	2.8165	3.62179	3.47499	1.50147	3.43384	1.31179
# of mitochondria				1.26911	1.23555	1.19385	0.605088	0.698478	0.48235
1_16 slice 3
Mean Value		592.692	879.288
Corrected Value		203.315	489.911
Distance (microns)		4.401	2.928
Corrected Distance		4.83413	3.54587
# of mitochondria		0.297485	0.716823

## Sheet: ctrl rnai N2 4_2
Elizabeth's L4440 N2	2023-11-06	4_2
embryo length	41.959		average mito	2397.3				ROI	8 pixels
4_2 slice 10 (SPERM PLANE)	Background Intensity	1	1	1	1	1	1	1	1	1	1	1	1	1	1
Mean Value	457.254	1969.27	3152.69	2913.11	3015.04	2752.29	1938.04	3735.9	3640.29	2578.35	2814.35	3390.61	3134.36	4416.44	3951.98	3984.79	3218.9	3227.94
Corrected Value		1512.01	2695.44	2455.86	2557.78	2295.03	1480.78	3278.65	3183.03	2121.09	2357.09	2933.36	2677.11	3959.19	3494.73	3527.53	2761.65	2770.69
Distance (microns)		3.73	2.894	3.445	3.445	2.627	2.761	2.145	1.941	1.388	2.036	2.544	2.12	1.545	2.08	3.231	1.97	1.776
# of mitochondria																1.47146	1.15198	1.15575
4_2 slice 11		1	1	1
Mean Value		2417.48	2834.9	3236.98	2586.1	5865.46
Corrected Value		1960.23	2377.65	2779.73	2128.84	5408.21
Distance (microns)		1.647	2.078	2.453	2.764	1.708
Corrected Distance		1.92681	2.3061	2.649	2.93934	1.97921
# of mitochondria					0.888015	2.25595
4_2 slice 12		1	1
Mean Value		2448.67	2947.71	2092.31	3465.81	2637.5	3171.58	3901.64	5250.79	5095.54	6373.83
Corrected Value		1991.42	2490.46	1635.05	3008.55	2180.25	2714.32	3444.38	4793.53	4638.28	5916.57
Distance (microns)		1.671	1.274	1.419	0.283	0.849	0.461	1.043	1.322	1.884	2.617
Corrected Distance		2.60619	2.3713	2.45226	2.01992	2.17274	2.05244	2.25563	2.39743	2.74763	3.29373
# of mitochondria				0.682039	1.25497	0.909458	1.13224	1.43677	1.99955	1.93479	2.46801
4_2 slice 9		1	1	1	1
Mean Value		2362.19	2092.58	2325	2354.6	2742.73	6601.54	5361.5	2879.58	2877.9	1993.85
Corrected Value		1904.94	1635.32	1867.75	1897.34	2285.48	6144.28	4904.25	2422.32	2420.65	1536.59
Distance (microns)		2.923	2.569	2.001	1.527	3.095	2.781	2.223	1.755	1.627	1.957
Corrected Distance		3.08933	2.75677	2.23696	1.8253	3.25254	2.95533	2.43757	2.01991	1.90975	2.19769
# of mitochondria						0.953353	2.563	2.04573	1.01044	1.00974	0.640967
4_2 slice 8		1	1
Mean Value		2330.46	3911.98
Corrected Value		1873.21	3454.73
Distance (microns)		3.226	2.832
Corrected Distance		3.79567	3.46702
# of mitochondria
4_2 slice 5		1
Mean Value		1553.21
Corrected Value		1095.96
Distance (microns)		3.086
Corrected Distance		5.87566
# of mitochondria

## Sheet: ctrl rnai N2 5_9
Elizabeth's L4440 N2	2023-11-06	5_9
embryo length	38.593		average mito	1492.95				ROI	8 pixels
5_9 slice 3 (SPERM PLANE)	Background Intensity	1	1	1
Mean Value	439.1	2448.69	2549.52	3050.27	6270.48	7395.69	6769.65	6655.1	7906.36
Corrected Value		2009.59	2110.42	2611.17	5831.38	6956.59	6330.55	6216	7467.26
Distance (microns)		1.61	1.042	2.57	2.233	2.174	2.323	2.562	2.381
# of mitochondria					3.90594	4.65962	4.24029	4.16356	5.00167
5_9 slice 4		1	1	1	1	1
Mean Value		1315.75	2215.35	1785.69	1809.85	1154.98	5506.35	2885.86	5343.08	6854.17	6290.06	5597.77
Corrected Value		876.65	1776.25	1346.59	1370.75	715.881	5067.25	2446.76	4903.98	6415.07	5850.96	5158.67
Distance (microns)		5.737	2.735	2.114	1.526	3.907	2.247	2.456	2.193	1.82	2.499	2.286
Corrected Distance		5.8235	2.91208	2.33859	1.82447	4.03295	2.45947	2.65178	2.41024	2.07663	2.69165	2.49515
# of mitochondria							3.39411	1.63888	3.28475	4.2969	3.91905	3.45534
5_9 slice 5		1	1	1
Mean Value		1121.29	1013.98	988.288	3882.69	4398.08	3551.21	4888.59	3993.86	4131.23	3799.92	2729.42
Corrected Value		682.188	574.881	549.188	3443.59	3958.98	3112.11	4449.49	3554.76	3692.13	3360.82	2290.32
Distance (microns)		7.457	5.894	6.954	1.717	2.035	1.246	1.552	1.979	2.233	2.052	1.991
Corrected Distance		7.72055	6.22409	7.23589	2.63592	2.85328	2.35638	2.53154	2.81362	2.99771	2.86543	2.82207
# of mitochondria					2.30656	2.65177	2.08453	2.98033	2.38103	2.47304	2.25112	1.53409
5_9 slice 6
Mean Value		2313.23	3610.67	3022.61	2847.89
Corrected Value		1874.13	3171.57	2583.51	2408.79
Distance (microns)		2.397	1.666	1.878	1.662
Corrected Distance		3.84	3.43155	3.53933	3.42961
# of mitochondria		1.25532	2.12436	1.73047	1.61344
5_9 slice 2		1	1	1
Mean Value		2731.52	2136.29	2172.71	7459.36	3804.5	4082.79	4203.65	6776.54	5253.64	7493.1	7202.79	10332.5
Corrected Value		2292.42	1697.19	1733.61	7020.26	3365.4	3643.69	3764.55	6337.44	4814.53	7054	6763.69	9893.42
Distance (microns)		0.86	1.273	1.515	1.824	2.592	0.787	2.458	2.304	1.692	2.7	2.418	2.734
Corrected Distance		1.31894	1.6188	1.81528	2.08014	2.77821	1.27254	2.65363	2.51166	1.96542	2.87924	2.61662	2.91114
# of mitochondria					4.70227	2.25419	2.44059	2.52155	4.2449	3.22484	4.72486	4.53041	6.62674
5_9 slice 1		1
Mean Value		2486.64	3770.65	3249.36	5596.98	4865.94	3573.08	2821.36	5644.36	4919.15
Corrected Value		2047.54	3331.55	2810.26	5157.88	4426.84	3133.98	2382.26	5205.26	4480.05
Distance (microns)		0.945	1.46	1.844	2.293	1.817	2.458	2.942	1.502	2.533
Corrected Distance		2.21202	2.47621	2.72036	3.04267	2.70213	3.16887	3.55744	2.5012	3.2274
# of mitochondria			2.23152	1.88235	3.45482	2.96516	2.09918	1.59567	3.48655	3.0008

## Sheet: ctrl rnai N2 4_8
Elizabeth's L4440 N2	2023-11-06	4_8
embryo length	44.124		average mito	1565.46				ROI	8 pixels
4_2 slice 4 (SPERM PLANE)	Background Intensity	1	1
Mean Value	275.224	1712.92	1346.88	2457.44	2318.92	3870.61	5328.58	6611.36	5305.69	4838.17
Corrected Value		1437.7	1071.66	2182.22	2043.7	3595.39	5053.35	6336.14	5030.47	4562.95
Distance (microns)		8.668	8.638	4.954	4.37	1.441	2.277	2.38	2.051	1.443
# of mitochondria				1.39398	1.30549	2.29669	3.22802	4.04745	3.2134	2.91476
4_2 slice 5		1	1	1	1	1
Mean Value		2447.06	1528.79	2357.35	2377.75	1737.25	3930.6	2411.35	1570.98	1374.04
Corrected Value		2171.83	1253.56	2082.12	2102.53	1462.03	3655.37	2136.12	1295.76	1098.81
Distance (microns)		1.544	2.006	2.555	2.77	3.239	2.139	1.732	4.655	5.095
Corrected Distance		1.83955	2.24144	2.74372	2.94498	3.38986	2.36121	1.99996	4.7612	5.19221
# of mitochondria							2.33501	1.36453	0.827714	0.701909
4_2 slice 6		1
Mean Value		1913.54	3200.11	4549.35	4035.79	1434.08	3445.75	2345.17
Corrected Value		1638.31	2924.89	4274.12	3760.56	1158.85	3170.53	2069.95
Distance (microns)		1.612	1.983	1.421	1.002	2.156	2.791	3.057
Corrected Distance		2.56876	2.81643	2.45341	2.23696	2.94081	3.43361	3.65311
# of mitochondria			1.86839	2.73026	2.4022	0.740262	2.02529	1.32226
4_2 slice 7		1	1	1	1
Mean Value		1632.38	1475.92	1948.5	1372.15	1836.35	3811.64	2500.6	2957.86	1569.54	2943.54	3163.73
Corrected Value		1357.16	1200.7	1673.28	1096.93	1561.12	3536.41	2225.37	2682.64	1294.31	2668.31	2888.51
Distance (microns)		2.123	1.664	2.706	2.876	1.841	1.173	0.637	1.053	1.484	2.89	3.051
Corrected Distance		3.6752	3.43058	4.0401	4.15588	3.51984	3.22117	3.06688	3.17944	3.34698	4.16559	4.27886
# of mitochondria						0.997226	2.25902	1.42154	1.71364	0.826792	1.70449	1.84514
4_2 slice 8
Mean Value		1153.06	1287.25
Corrected Value		877.834	1012.03
Distance (microns)		2.804	3.066
Corrected Distance		4.88492	5.03988
# of mitochondria		0.56075	0.64647
4_2 slice 3		1
Mean Value		3028.79	4253.89	4934.81	6390.61	5873.14	6063.11	4443.9
Corrected Value		2753.56	3978.66	4659.58	6115.39	5597.91	5787.89	4168.68
Distance (microns)		1.747	0.414	0.515	1.21	1.163	1.974	2.004
Corrected Distance		2.01296	1.08231	1.12482	1.56975	1.53381	2.21284	2.23965
# of mitochondria			2.54152	2.97649	3.90644	3.57588	3.69724	2.6629
4_2 slice 2		1
Mean Value		890.346	4919.77	5451.4	4371.39
Corrected Value		615.122	4644.55	5176.18	4096.16
Distance (microns)		5.488	1.165	1.277	0.867
Corrected Distance		5.84107	2.31457	2.37292	2.17984
# of mitochondria			2.96688	3.30648	2.61658
4_2 slice 1
Mean Value		2101.64
Corrected Value		1826.41
Distance (microns)		1.114
Corrected Distance		3.20016
# of mitochondria		1.16669

## Sheet: ctrl rnai N2 4_1
Elizabeth's L4440 N2	2023-11-06	4_1
embryo length	50.105		average mito	2514.25				ROI	8 pixels
4_1 slice 8 (SPERM PLANE)	Background Intensity	1	1	1	1	1	1
Mean Value	309.874	2245.81	2659.83	3096.54	2491.89	4001	3463.25	3302.29	5971.64	3119	4500	4423.9	5927.15	5170.92	6244.96	8431.73	5342.36	2362.64
Corrected Value		1935.93	2349.95	2786.66	2182.01	3691.13	3153.38	2992.41	5661.76	2809.13	4190.13	4114.03	5617.28	4861.05	5935.09	8121.86	5032.49	2052.76
Distance (microns)		1.678	1.26	1.038		2.17	2.163	3.47	1.189	2.989	2.23	2.626	2.064	0.971	2.301	1.596	1.816	4.825
# of mitochondria								1.19018	2.25187	1.11728	1.66655	1.63628	2.23418	1.9334	2.36058	3.23033	2.00159	0.81645
4_1 slice 9		1	1	1	1	1	1
Mean Value		1842.94	2013.94	3165.04	2547.94	1838.4	1606.1	3901.14	4610.08	4444.14	4961.69	5029.15	5413.83	4638.73	2667.56	2123.75
Corrected Value		1533.07	1704.07	2855.16	2238.07	1528.53	1296.22	3591.26	4300.2	4134.26	4651.82	4719.28	5103.95	4328.86	2357.68	1813.88
Distance (microns)		2.615	1.878	1.596	2.336	7.696	8.152	2.391	0.526	0.916	2.069	2.122	1.788	2.193	1.952	2.422
Corrected Distance		2.79968	2.12765	1.88341	2.54104	7.7607	8.21311	2.59169	1.1299	1.35612	2.29799	2.34582	2.04864	2.41024	2.19324	2.62032
# of mitochondria								1.42836	1.71033	1.64433	1.85018	1.87701	2.03001	1.72173	0.937728	0.721438
4_1 slice 10		1	1
Mean Value		2583.58	3348.25	4812.21	2195.15	7745.31	7387.35	3021.5	2728.27	4081.06
Corrected Value		2273.7	3038.38	4502.34	1885.28	7435.43	7077.47	2711.63	2418.39	3771.18
Distance (microns)		1.829	0.303	0.699	1.981	0.652	0.9	1.333	1.926	2.552
Corrected Distance		2.71021	2.02282	2.11863	2.81502	2.10359	2.19317	2.40352	2.77659	3.24233
# of mitochondria				1.79073	0.749837	2.95732	2.81494	1.0785	0.961875	1.49992
4_1 slice 11
Mean Value		2862.54	3582.35	2706.06
Corrected Value		2552.66	3272.47	2396.18
Distance (microns)		0.702	0.622	0.434
Corrected Distance		3.08104	3.0638	3.03123
# of mitochondria		1.01528	1.30157	0.953041
4_1 slice 7		1	1	1	1	1	1	1	1	1
Mean Value		2180.52	3580.02	1325.48	4404.36	2718.29	3418.04	3956.27	4692.08	3870.6	4693.61	1897.35	2403.14	1841.83	2076.15	7974.19	11419.4	6719.02	8696.77	1213.67
Corrected Value		1870.64	3270.14	1015.61	4094.49	2408.41	3108.16	3646.39	4382.2	3560.72	4383.74	1587.47	2093.26	1531.95	1766.28	7664.32	11109.6	6409.15	8386.9	903.799
Distance (microns)		3.736	3.536	5.639	1.059	1.062	1.227	0.991	1.08	0.891	0.128	2.261	2.313	3.082	2.403	0.95	1.741	1.644	1.974	4.914
Corrected Distance		3.86752	3.67468	5.72698	1.45653	1.45871	1.58289	1.40786	1.47187	1.33936	1.00816	2.47227	2.51991	3.24017	2.60277	1.37931	2.00776	1.92425	2.21284	5.01472
# of mitochondria											1.74356	0.631389	0.832558	0.609308	0.702507	3.04835	4.41864	2.54913	3.33574	0.35947
4_1 slice 6
Mean Value		6573.71	5906.98	5250.15	2505.52	2173.96	1892.98
Corrected Value		6263.84	5597.11	4940.28	2195.64	1864.09	1583.11
Distance (microns)		0.993	1.434	1.558	0.309	1.267	0.953
Corrected Distance		2.23295	2.46097	2.53522	2.02373	2.36755	2.21545
# of mitochondria		2.49133	2.22615	1.96491	0.87328	0.741409	0.629653
4_1 slice 5		1
Mean Value		2492.08
Corrected Value		2182.2
Distance (microns)		1.22
Corrected Distance		3.23858
# of mitochondria
4_1 slice 4		1	1	1
Mean Value		1989.15	2624.02	897.212
Corrected Value		1679.28	2314.14	587.338
Distance (microns)		3.752	1.389	10.294
Corrected Distance		5.4843	4.2343	11.0438
# of mitochondria
4_1 slice 3		1
Mean Value		4022.9	1635.73
Corrected Value		3713.03	1325.86
Distance (microns)		3.06	1.422
Corrected Distance		5.86205	5.19828
# of mitochondria			0.527337

## Sheet: ctrl rnai N2 1_5
		individual intensity		distance
		1154.51		37.284
slide 1_5 slice 4 (SPERM PLANE)	Background Intensity	g	g	g	g	g	g	g	g	g	g
Mean Value	845.592	1043.46	1205.6	2939.89	1207.85	1621.6	883.154	986.596	1234.56	973.154	1170.85
Corrected Value		197.87	360.004	2094.29	362.254	776.004	37.562	141.004	388.966	127.562	325.254
Distance (microns)		3.006	2.002	1.404	1.959	2.018	2.937	2.735	2.546	3.375	2.373
Corrected Distance		3.006	2.002	1.404	1.959	2.018	2.937	2.735	2.546	3.375	2.373
Percent Distance		8.06244	5.3696	3.76569	5.25426	5.41251	7.87737	7.33559	6.82867	9.05214	6.36466
# of mitochondria		0.171389	0.311824	1.81401	0.313773	0.67215	0.032535	0.122133	0.33691	0.11049	0.281725
slide 1_5 slice 5		1	1	1	g	g
Mean Value		1895.71	1973.85	2130.75	1850.13	1091.08
Corrected Value		1050.12	1128.25	1285.16	1004.54	245.491
Distance (microns)		2.654	2.038	1.678	1.193	3.548
Corrected Distance		2.83614	2.27012	1.95338	1.55668	3.68623
Percent Distance					4.17519	9.8869
# of mitochondria					0.870103	0.212636
slide 1_5 slice 6		g	g	g	g	g	g
Mean Value		1515.15	1383.98	1694.17	992.577	1148.67	1111.29
Corrected Value		669.562	538.389	848.581	146.985	303.081	265.696
Distance (microns)		1.891	1.405	2.483	3.75	1.894	2.626
Corrected Distance		2.75243	2.44418	3.18831	4.25	2.75449	3.30089
Percent Distance		7.38234	6.55558	8.5514	11.399	7.38787	8.85337
# of mitochondria		0.579953	0.466335	0.735014	0.127314	0.262519	0.230137
slide 1_5 slice 7		g	g	g	g	g	g	g
Mean Value		1134.96	1042.17	1049.38	972.385	1721.71	1539.67	1202.65
Corrected Value		289.37	196.581	203.793	126.793	876.12	694.081	357.062
Distance (microns)		2.114	1.443	1.997	3.422	1.579	2.088	2.586
Corrected Distance		3.67001	3.329	3.60389	4.55083	3.39017	3.6551	3.96073
Percent Distance		9.8434	8.92877	9.66604	12.2059	9.09282	9.8034	10.6231
# of mitochondria		0.250643	0.170272	0.176519	0.109824	0.758867	0.601191	0.309276
slide 1_5 slice 8		g
Mean Value		3275.86
Corrected Value		2430.27
Distance (microns)		1.639
Corrected Distance		4.32277
Percent Distance		11.5942
# of mitochondria		2.10502
slide 1_5 slice 9		g
Mean Value		2553.31
Corrected Value		1707.72
Distance (microns)		1.638
Corrected Distance		5.26147
Percent Distance		14.1119
# of mitochondria		1.47917
slide 1_5 slice 3		g	g	g	g
Mean Value		1168.5	1452.31	1034.06	1048.48
Corrected Value		322.908	606.716	188.466	202.889
Distance (microns)		3.061	1.3	1.979	2.247
Corrected Distance		3.22021	1.64012	2.2173	2.45947
Percent Distance		8.63696	4.399	5.94707	6.59659
# of mitochondria		0.279693	0.525518	0.163243	0.175736
slide 1_5 slice 2		g	g	g
Mean Value		1133.73	1012.44	925.269
Corrected Value		288.139	166.85	79.677
Distance (microns)		1.551	0.669	1.598
Corrected Distance		2.53093	2.10892	2.56
Percent Distance		6.78824	5.65638	6.86622
# of mitochondria		0.249577	0.14452	0.0690137
slide 1_5 slice 1		g
Mean Value		980.058
Corrected Value		134.466
Distance (microns)		1.649
Corrected Distance		3.42333
Percent Distance		9.18177
# of mitochondria		0.11647

[truncated: 104 more sheets: atx-2 rnai N2 1_7, atx-2 rnai N2 1_17, atx-2 rnai N2 1_18, atx-2 rnai N2 1_22, atx-2 rnai N2 1_20 , atx-2 rnai N2 1_10, atx-2 rnai N2 1_1, atx-2 rnai N2 1_8, atx-2 rnai N2 1_9, atx-2 rnai N2 1_3, ctrl rnai fm638 4_14, ctrl rnai fm638 4_2, ctrl rnai fm638 5_24, ctrl rnai fm638 4_15, ctrl rnai fm638 4_18, ctrl rnai fm638 5_1, ctrl rnai fm638 5_33, ctrl rnai fm638 5_37, ctrl rnai fm638 5_2, atx-2 rnai fm638 1_1 …]
